# Supplementary material for: Real World Experience of Second-Line Treatment Strategies after Palbociclib and Letrozole: Overall Survival in Metastatic Hormone Receptor-Positive Human Epidermal Growth Factor Receptor 2-Negative Breast Cancer
Source: MDPI journal article supplement (doi:10.3390/cancers15133431), 2023-06-30
Supplement: s1 [file s1]

**Supplementary Table S1. Baseline patient characteristics (N=305)**

| <b>Characteristic</b>                    | <b>Progression (N=181)</b> | <b>No progression (N=124)</b> | <b>P-value</b>   |
|------------------------------------------|----------------------------|-------------------------------|------------------|
| <b>Median FU (IQR)</b>                   | <b>39.8 (30.7,49.7)</b>    | <b>44.7 (36.1, 50.1)</b>      |                  |
| <b>Age</b>                               |                            |                               | <b>.308</b>      |
| <b>Median (range)</b>                    | <b>51.5 (31.5, 78.1)</b>   | <b>52.0 (33.3, 86.7)</b>      |                  |
| <b>&lt;50 years old</b>                  | <b>80 (44.2)</b>           | <b>50 (40.3)</b>              |                  |
| <b>&gt;50 years old</b>                  | <b>101 (55.8)</b>          | <b>74 (59.7)</b>              |                  |
| <b>ECOG PS<sup>1</sup></b>               |                            |                               | <b>.465</b>      |
| <b>0</b>                                 | <b>104 (57.5)</b>          | <b>73 (58.9)</b>              |                  |
| <b>1</b>                                 | <b>75 (41.4)</b>           | <b>47 (37.9)</b>              |                  |
| <b>≥2</b>                                | <b>2 (1.1)</b>             | <b>3 (2.4)</b>                |                  |
| <b>Unknown</b>                           | <b>0</b>                   | <b>1 (0.8)</b>                |                  |
| <b>Disease status</b>                    |                            |                               | <b>.716</b>      |
| <b>De novo</b>                           | <b>62 (34.3)</b>           | <b>45 (36.3)</b>              |                  |
| <b>Recurred</b>                          | <b>119 (65.7)</b>          | <b>79 (63.7)</b>              |                  |
| <b>Adjuvant CTx.</b>                     | <b>92 (50.8)</b>           | <b>71 (57.3)</b>              |                  |
| <b>Neoadjuvant CTx</b>                   | <b>27 (14.9)</b>           | <b>8 (6.4)</b>                |                  |
| <b>Disease-free interval<sup>2</sup></b> | <b>(n=198)</b>             |                               | <b>.056</b>      |
| <b>&lt;12 months</b>                     | <b>76 (63.9)</b>           | <b>39 (49.4)</b>              |                  |
| <b>≥12 months</b>                        | <b>43 (36.1)</b>           | <b>40 (50.6)</b>              |                  |
| <b>Metastatic sites</b>                  |                            |                               | <b>&lt;.001</b>  |
| <b>Visceral</b>                          | <b>52 (28.7)</b>           | <b>14 (11.3)</b>              |                  |
| <b>Liver</b>                             | <b>48 (26.5)</b>           | <b>12(9.7)</b>                |                  |
| <b>Non-visceral</b>                      | <b>129 (71.3)</b>          | <b>110 (88.7)</b>             |                  |
| <b>Bone only</b>                         | <b>57 (31.5)</b>           | <b>46 (37.1)</b>              |                  |
| <b>No. of disease sites</b>              |                            |                               | <b>.012</b>      |
| <b>1</b>                                 | <b>81 (44.8)</b>           | <b>77 (62.1)</b>              |                  |
| <b>2</b>                                 | <b>68 (37.6)</b>           | <b>32 (25.8)</b>              |                  |
| <b>3 or more</b>                         | <b>32 (17.6)</b>           | <b>15 (12.1)</b>              |                  |
| <b>Germline BRCA status</b>              |                            |                               | <b>.041</b>      |
| <b>Not tested</b>                        | <b>115 (63.5)</b>          | <b>91 (73.4)</b>              |                  |
| <b>BRCA1/2 mutation</b>                  | <b>6 (3.3)</b>             | <b>0</b>                      |                  |
| <b>No BRCA mutation</b>                  | <b>60 (33.2)</b>           | <b>33 (26.6)</b>              |                  |
| <b>Initial CA-15-3 status</b>            |                            |                               | <b>.001</b>      |
| <b>Normal range</b>                      | <b>91 (50.3)</b>           | <b>85 (68.5)</b>              |                  |
| <b>Elevated</b>                          | <b>81 (44.8)</b>           | <b>30 (24.2)</b>              |                  |
| <b>Unknown</b>                           | <b>9 (4.9)</b>             | <b>9 (7.3)</b>                |                  |
| <b>Initial CEA status</b>                |                            |                               | <b>&lt;0.001</b> |
| <b>Normal range</b>                      | <b>128 (70.7)</b>          | <b>103 (83.1)</b>             |                  |
| <b>Elevated</b>                          | <b>49 (27.1)</b>           | <b>13 (10.5)</b>              |                  |
| <b>Unknown</b>                           | <b>4 (2.2)</b>             | <b>8 (6.4)</b>                |                  |

**1: performance status; 2: defined as breast cancer recurrence within 1 year following adjuvant ET completion**

**Supplementary Table S2. Second line treatment strategy after palbociclib with letrozole treatment (N=166)**

| <b>Regimen</b>                             | <b>N (%)</b> |
|--------------------------------------------|--------------|
| Capecitabine                               | 47 (28.3%)   |
| Exemestane with everolimus                 | 45 (27.1%)   |
| Cytotoxic chemotherapy except capecitabine | 33 (19.8%)   |
| Taxene (paclitaxel, docetaxel)             | 28 (16.8%)   |
| Anthracycline based regimen                | 3 (1.8%)     |
| Others*                                    | 2 (1.2%)     |
| Fulvestrant, other ET only                 | 23 (13.8%)   |
| Fulvestrant                                | 19 (11.4%)   |
| Palbociclib + fulvestrant                  | 2 (1.2%)     |
| Exemestane                                 | 1 (0.6%)     |
| Tamoxifen                                  | 1 (0.6%)     |
| Clinical trials                            | 18 (10.8%)   |

**Supplementary Table S3. Disease progression sites after palbociclib with letrozole (N=164)**

| <b>Organ</b>                 | <b>N (%)</b> |
|------------------------------|--------------|
| Visceral                     | 64 (39.0%)   |
| Liver                        | 61 (37.2%)   |
| Central nerve system         | 4 (2.4%)     |
| Lymphangitic lung metastases | 1 (0.6%)     |
| Non-visceral metastasis      | 53 (32.3%)   |
| Lung                         | 11 (6.7%)    |
| Lymph nodes                  | 27 (16.5%)   |
| Breast                       | 12 (7.3%)    |
| Pleura                       | 8 (4.9%)     |
| Ovary                        | 1 (0.6%)     |
| Stomach                      | 1 (0.6%)     |
| Bone only                    | 47 (28.7%)   |
